# Supplementary material
Source: Elsevier journal article supplement (https://www.sciencedirect.com/science/article/pii/S0025775319307183)
Supplement: mmc1 [file S0025775319307183:mmc1.doc]

**MATERIAL SUPLEMENTARIO**

**MÉTODOS**

La población española de 40 a 99 años se tomó de los datos de población censada facilitados por el Instituto Nacional de Estadística (INE)1 para cada año del periodo de estudio (2002-2015). La población de cada año se dividió en 24 estratos de sexo y edad (5 años). Para estimar la población española susceptible de recibir un tratamiento con AAS en prevención primaria, se excluyó de cada estrato las proporciones estimadas de sujetos con: 1) los criterios de exclusión del estudio epidemiológico (antecedentes de cáncer, y síndrome coronario agudo); 2) antecedentes de otra enfermedad vascular oclusiva (angina de pecho o uso de nitratos, enfermedad arterial periférica, ictus y accidente isquémico transitorio); y 3) antecedentes de fibrilación auricular. Dichas proporciones fueron obtenidas de BIFAP (Base de datos para la Investigación Farmacoepidemiológica en Atención Primaria)2. Véase como ejemplo los cálculos realizados para la población del 2015 en tabla suplementaria 1.

**REFERENCIAS**

1. Instituto Nacional de Estadística (INE). Disponible en: <https://ine.es/welcome.shtml>. Acceso: 11 de febrero de 2009.
2. Base de datos para la Investigación Farmacoepidemiológica en Atención Primaria (BIFAP). Disponible en: [http://www.bifap.org](http://www.bifap.org/). Acceso: 11 de febrero de 2019

**Tabla suplementaria 1. Población española en prevención primaria por cada estrato de sexo y edad para el año 2015.** Las proporciones indicadas en las columnas se aplicaron de forma secuencial.

| **Grupo de edad** | **Sexo** | **Población INE 2015** | **Población con criterios de exclusión para conformar la cohorte de estudio en BIFAP***  **(tanto por 1)** | **Población con antecedentes de EVO**  **(tanto por 1)** # | **Población con antecedentes de FA**  **(tanto por 1)** # | **Población prevención primaria** |
| --- | --- | --- | --- | --- | --- | --- |
| 40-44 | Hombres | 1.982.454 | 0,0137 | 0,0087 | 0,0039 | 1.930.768 |
| Mujeres | 1.907.214 | 0,0267 | 0,0078 | 0,0000 | 1.841.909 |
| 45-49 | Hombres | 1.861.330 | 0,0253 | 0,0150 | 0,0049 | 1.778.351 |
| Mujeres | 1.829.679 | 0,0418 | 0,0074 | 0,0019 | 1.737.086 |
| 50-54 | Hombres | 1.698.889 | 0,0432 | 0,0311 | 0,0071 | 1.563.715 |
| Mujeres | 1.710.109 | 0,0539 | 0,0194 | 0,0032 | 1.581.454 |
| 55-59 | Hombres | 1.467.133 | 0,0669 | 0,0493 | 0,0153 | 1.281.488 |
| Mujeres | 1.511.242 | 0,0627 | 0,0242 | 0,0069 | 1.372.730 |
| 60-64 | Hombres | 1.219.620 | 0,0954 | 0,0755 | 0,0245 | 994.958 |
| Mujeres | 1.288.215 | 0,0709 | 0,0343 | 0,0117 | 1.142.311 |
| 65-69 | Hombres | 1.120.627 | 0,1227 | 0,1082 | 0,0398 | 841.857 |
| Mujeres | 1.236.886 | 0,0754 | 0,0581 | 0,0252 | 1.050.028 |
| 70-74 | Hombres | 902.510 | 0,1917 | 0,1482 | 0,0588 | 584.824 |
| Mujeres | 1.046.518 | 0,1260 | 0,0795 | 0,0406 | 807.705 |
| 75-79 | Hombres | 673.645 | 0,2195 | 0,1895 | 0,0838 | 390.446 |
| Mujeres | 879.422 | 0,1365 | 0,1200 | 0,0616 | 627.102 |
| 80-84 | Hombres | 573.318 | 0,2287 | 0,2359 | 0,1172 | 298.293 |
| Mujeres | 852.247 | 0,1403 | 0,1564 | 0,0891 | 562.994 |
| 85-89 | Hombres | 301.428 | 0,2286 | 0,2613 | 0,1491 | 146.138 |
| Mujeres | 553.995 | 0,1421 | 0,1939 | 0,1135 | 339.658 |
| 90-94 | Hombres | 105.675 | 0,2277 | 0,2826 | 0,1285 | 51.026 |
| Mujeres | 251.486 | 0,1439 | 0,2282 | 0,1117 | 147.605 |
| 95-99 | Hombres | 17.044 | 0,2113 | 0,2667 | 0,0909 | 8.962 |
| Mujeres | 54.465 | 0,1426 | 0,2154 | 0,0847 | 33.537 |

* Criterios de exclusión: Antecedentes de síndrome coronario agudo o cáncer, o menos de 1 año de registro con el médico.

# Datos obtenidos de BIFAP

**Abreviaturas:** INE: Instituto Nacional de Estadística; BIFAP: Base de datos para la Investigación Farmacoepidemiológica en Atención Primaria; EVO: Enfermedad vascular oclusiva; FA: fibrilación auricular.

**Tabla suplementaria 2. Cálculo de la prevalencia estandarizada de prescripción de ácido acetilsalicílico a dosis bajas (AAS-DB) para el año 2015.**

| **Grupo de edad** | **Sexo** | **Población prevención primaria** | **Pesos**  **(tanto por 1)** | **Usuarios actuales de AAS-DB en población de estudio** | **Población de estudio** | **Prevalencia cruda (%)** | **Prevalencias ponderadas (%)** | **Número estimado de usuarios actuales de AAS-DB en España** |
| --- | --- | --- | --- | --- | --- | --- | --- | --- |
| 40-44 | Hombres | 1.930.768 | 0,0914 | 3 | 386 | 0,78 | 0,07 | 15.006 |
| Mujeres | 1.841.909 | 0,0872 | 0 | 57 | 0,00 | 0,00 | 0 |
| 45-49 | Hombres | 1.778.351 | 0,0842 | 11 | 791 | 1,39 | 0,12 | 24.731 |
| Mujeres | 1.737.086 | 0,0823 | 0 | 138 | 0,00 | 0,00 | 0 |
| 50-54 | Hombres | 1.563.715 | 0,0741 | 15 | 1.100 | 1,36 | 0,10 | 21.323 |
| Mujeres | 1.581.454 | 0,0749 | 0 | 176 | 0,00 | 0,00 | 0 |
| 55-59 | Hombres | 1.281.488 | 0,0607 | 32 | 1.318 | 2,43 | 0,15 | 31.114 |
| Mujeres | 1.372.730 | 0,0650 | 6 | 292 | 2,05 | 0,13 | 28.207 |
| 60-64 | Hombres | 994.958 | 0,0471 | 45 | 1.061 | 4,24 | 0,20 | 42.199 |
| Mujeres | 1.142.311 | 0,0541 | 5 | 228 | 2,19 | 0,12 | 25.051 |
| 65-69 | Hombres | 841.857 | 0,0399 | 75 | 963 | 7,79 | 0,31 | 65.565 |
| Mujeres | 1.050.028 | 0,0497 | 20 | 292 | 6,85 | 0,34 | 71.920 |
| 70-74 | Hombres | 584.824 | 0,0277 | 58 | 694 | 8,36 | 0,23 | 48.876 |
| Mujeres | 807.705 | 0,0383 | 19 | 341 | 5,57 | 0,21 | 45.004 |
| 75-79 | Hombres | 390.446 | 0,0185 | 72 | 657 | 10,96 | 0,20 | 42.789 |
| Mujeres | 627.102 | 0,0297 | 34 | 321 | 10,59 | 0,31 | 66.422 |
| 80-84 | Hombres | 298.293 | 0,0141 | 78 | 613 | 12,72 | 0,18 | 37.956 |
| Mujeres | 562.994 | 0,0267 | 67 | 486 | 13,79 | 0,37 | 77.614 |
| 85-89 | Hombres | 146.138 | 0,0069 | 40 | 320 | 12,50 | 0,09 | 18.267 |
| Mujeres | 339.658 | 0,0161 | 47 | 412 | 11,41 | 0,18 | 38.747 |
| 90-94 | Hombres | 51.026 | 0,0024 | 15 | 83 | 18,07 | 0,04 | 9.222 |
| Mujeres | 147.605 | 0,0070 | 34 | 191 | 17,80 | 0,12 | 26.275 |
| 95-99 | Hombres | 8.962 | 0,0004 | 1 | 14 | 7,14 | 0,01 | 640 |
| Mujeres | 33.537 | 0,0016 | 9 | 42 | 21,43 | 0,03 | 7.186 |
| **Total** |  | **21.114.945** | **1** | **686** | **10.976** | **6,25** | **3,52** | **744.113** |

**Tabla suplementaria 3.** Pacientes en tratamiento con AAS-DB en función de la edad (<70 años o más), del número de factores de riesgo cardiovascular (hipertensión, dislipemia, insuficiencia renal crónica), del riesgo de sangrado (antecedentes de úlcera/hemorragia digestiva alta/tratamiento anticoagulante) y de si son o no diabéticos

| **Usuarios AAS-DB** | **Total (%)***  **N=6.198** | **Diabéticos (%)****  **N= 2.574** | **No diabéticos (%)****  **N= 3.624** |
| --- | --- | --- | --- |
| **<70 años** | 1.829 (29,5) | 977 (53,4) | 852 (46,6) |
| Antecedentes de Ulcera/HDA/anticoagulados | 77 (1,2) | 42 (54,5) | 35 (45,5) |
| Sin FR | 243 (3,9) | 79 (32,5) | 164 (67,5) |
| 1 FR | 775 (12,5) | 358 (46,2) | 417 (53,8) |
| 2 FR o más | 811 (13,1) | 540 (66,6) | 271 (33,4) |
| **70 años o más** | 4.369 (70,5) | 1.597 (36,5) | 2.772 (63,4) |
| Antecedentes de Ulcera/HDA/anticoagulados | 231 (3,7) | 94 (40,7) | 137 (59,3) |
| Sin FR | 666 (10,7) | 132 (19,8) | 534 (80,2) |
| 1 FR | 1.817 (29,3) | 526 (28,9) | 1.291 (71,1) |
| 2 FR o más | 1.886 (30,4) | 939 (49,8) | 947 (50,2) |

*Porcentaje de columna

**Porcentaje de fila

**Abreviaturas**: AAS-DB: Ácido Acetilsalicílico a dosis bajas; HDA: Hemorragia digestiva alta; FR: factor de riesgo cardiovascular.

**Figura suplementaria 1. Prescripción concomitante de ácido acetilsalicílico a dosis bajas (AAS-DB) con otros fármacos en pacientes diabéticos.**

Abreviaturas: IBP: Inhibidores de la bomba de protones; AINE: Antiinflamatorios no esteroídicos; COX-2: isoenzima 2 de la ciclooxigenasa

**
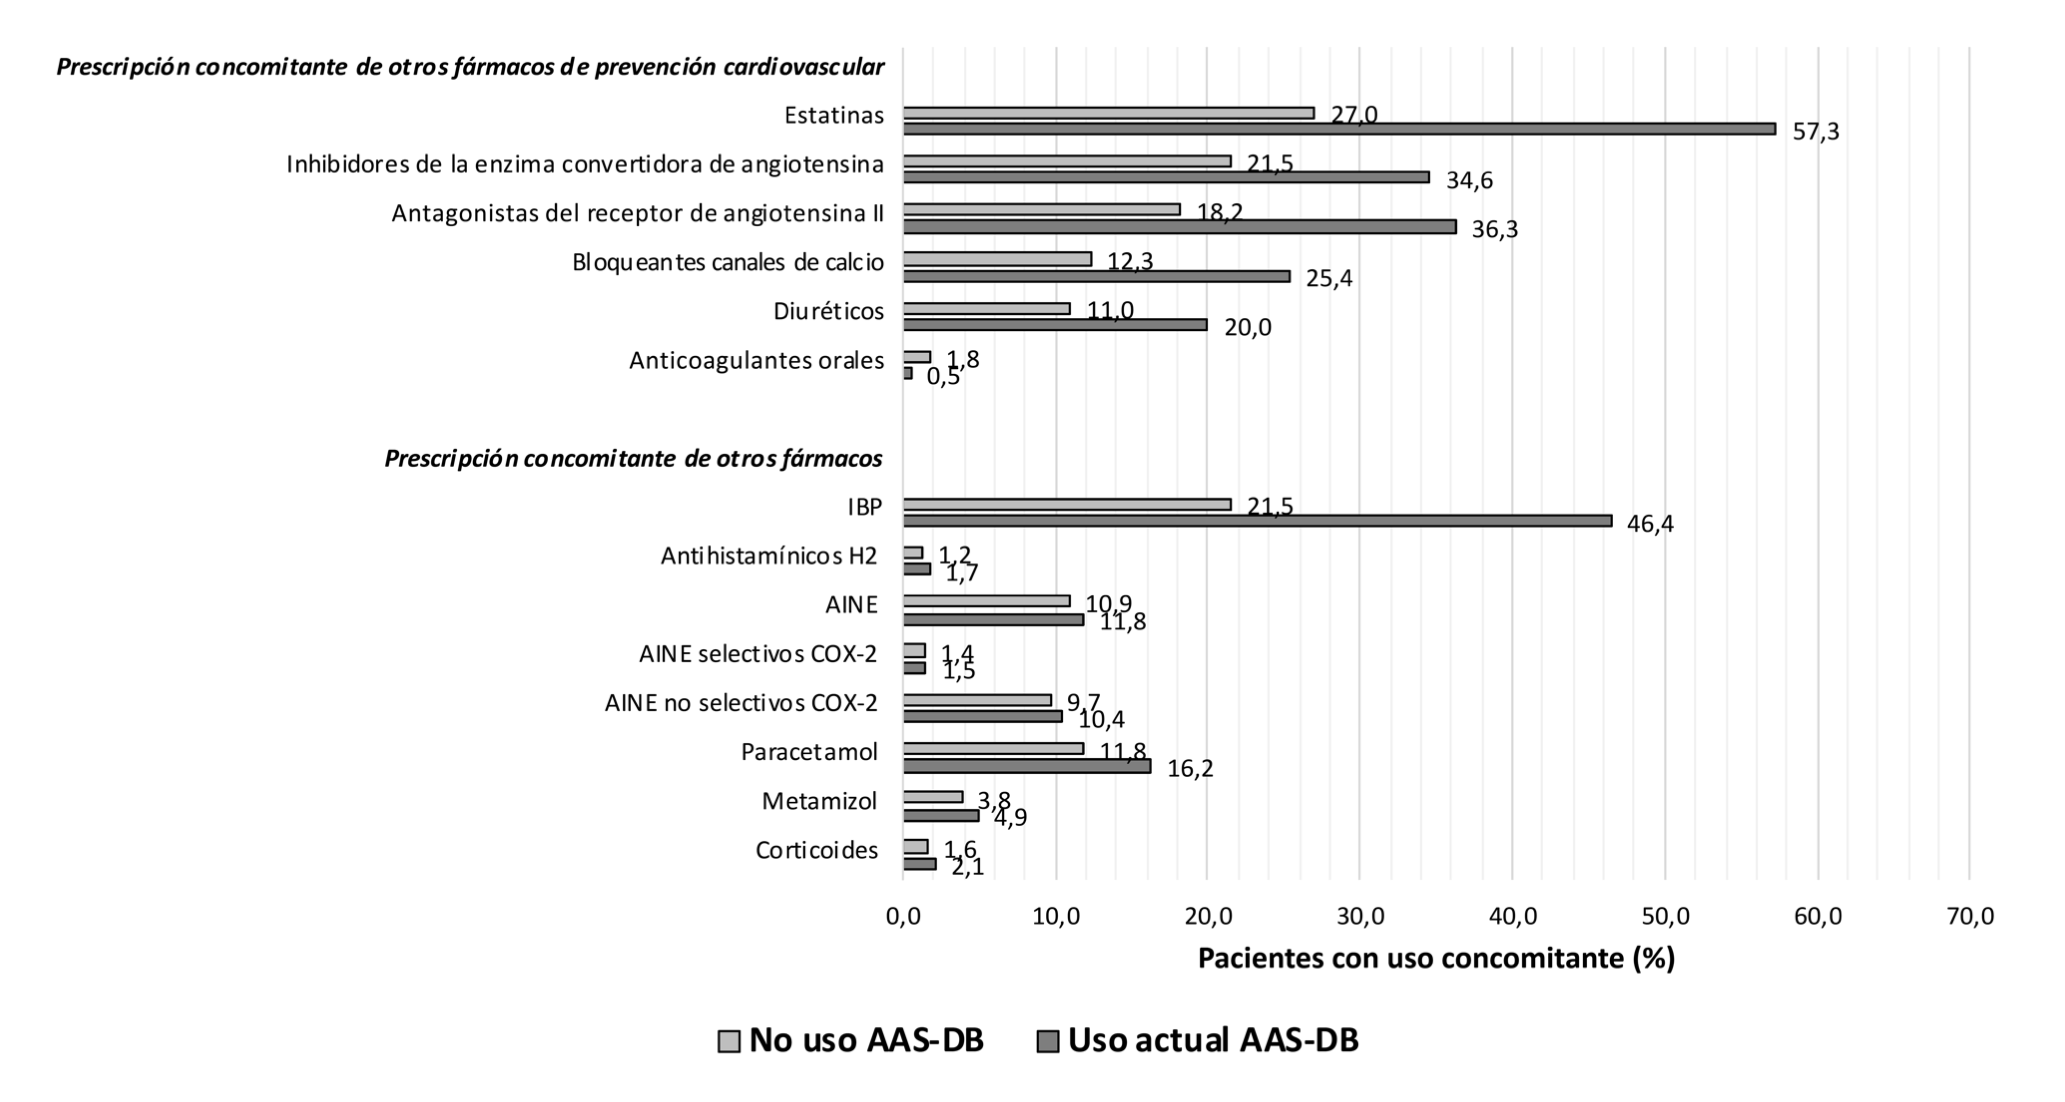
**
